# Supplementary material
Source: publisher site journal article supplement (https://www.spandidos-publications.com/1769/downloadSupplementary)

Figure S1. CREBBP expression has no effect on the sensitivity of L-ASP to Jurkat and Reh cells. (A)  $IC_{50}$  values of L-ASP were 4.696 U/ml vs. 4.596 U/ml in RNAi-treated Jurkat cells ( $P=0.94$ ) and (B) 4.696 U/ml vs. 5.297 U/ml in SAM-treated Jurkat cells ( $P=0.71$ ). (C)  $IC_{50}$  values of L-ASP were 0.8211 U/ml vs. 0.8249 U/ml in RNAi-treated Reh cells ( $P=0.82$ ) and (D) 5.236 U/ml vs. 6.770 U/ml in SAM-treated Reh cells ( $P=0.61$ ). Data are presented as the mean  $\pm$  standard error of the mean ( $n=3$ ). CREBBP, CREB-binding protein; L-ASP, L-asparaginase; RNAi, RNA interference; SAM, synergistic activation mediator.

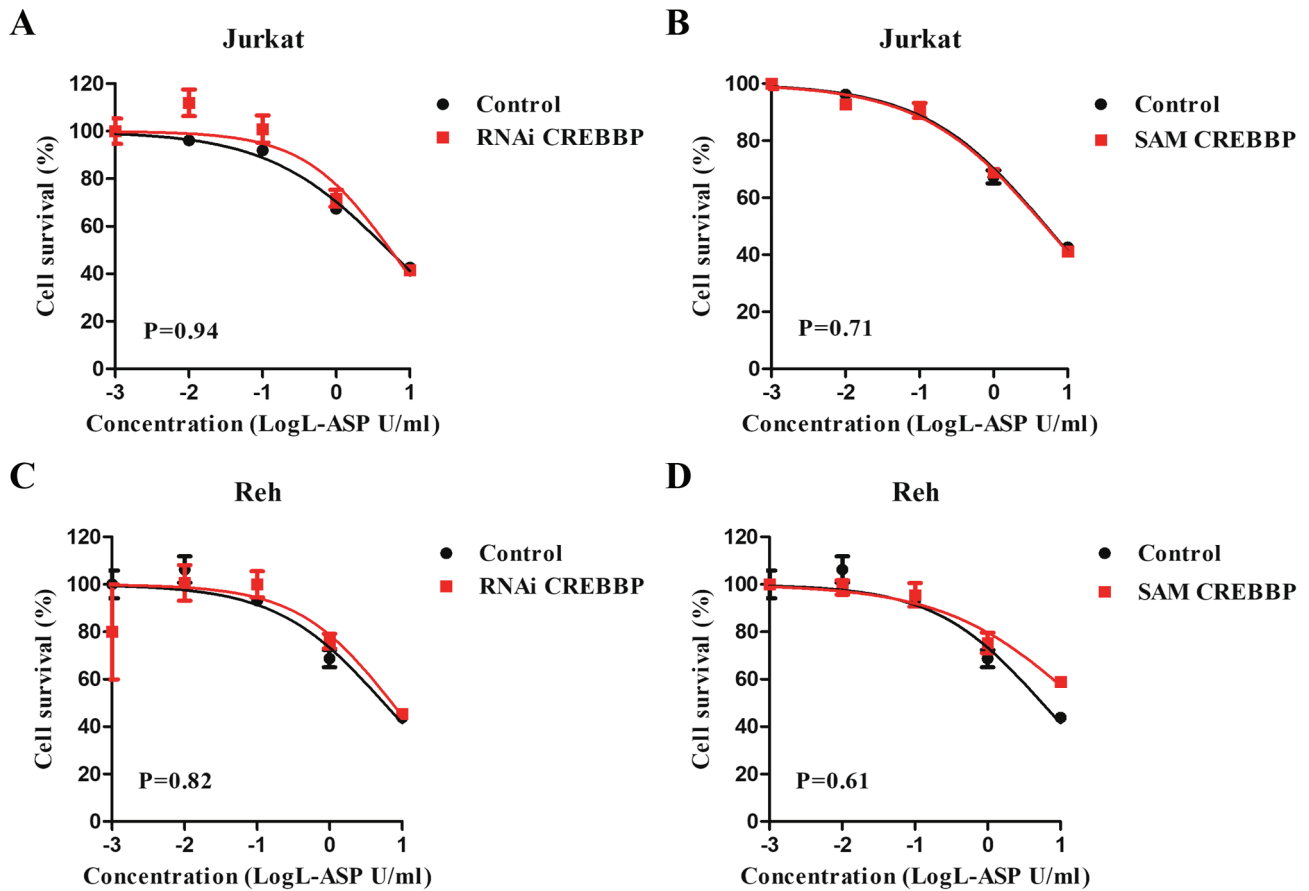

Figure S2. CREBBP expression has no effect on the sensitivity of VCR to Jurkat and Reh cells. (A)  $IC_{50}$  values of VCR were  $274.4\ \mu\text{M}$  vs.  $186.5\ \mu\text{M}$  in RNAi treated Jurkat cells ( $P=0.40$ ) and (B)  $297.1\ \mu\text{M}$  vs.  $295.9\ \mu\text{M}$  in SAM treated Jurkat cells ( $P=0.99$ ). (C)  $IC_{50}$  values of VCR were  $3.047\ \mu\text{M}$  vs.  $2.634\ \mu\text{M}$  in RNAi treated Reh cells ( $P=0.80$ ) and (D)  $5.951\ \mu\text{M}$  vs.  $6.735\ \mu\text{M}$  in SAM treated Reh cells ( $P=0.52$ ). Data are presented as the mean  $\pm$  standard error of the mean ( $n=3$ ). CREBBP, CREB binding protein; VCR, vincristine; RNAi, RNA interference; SAM, synergistic activation mediator.

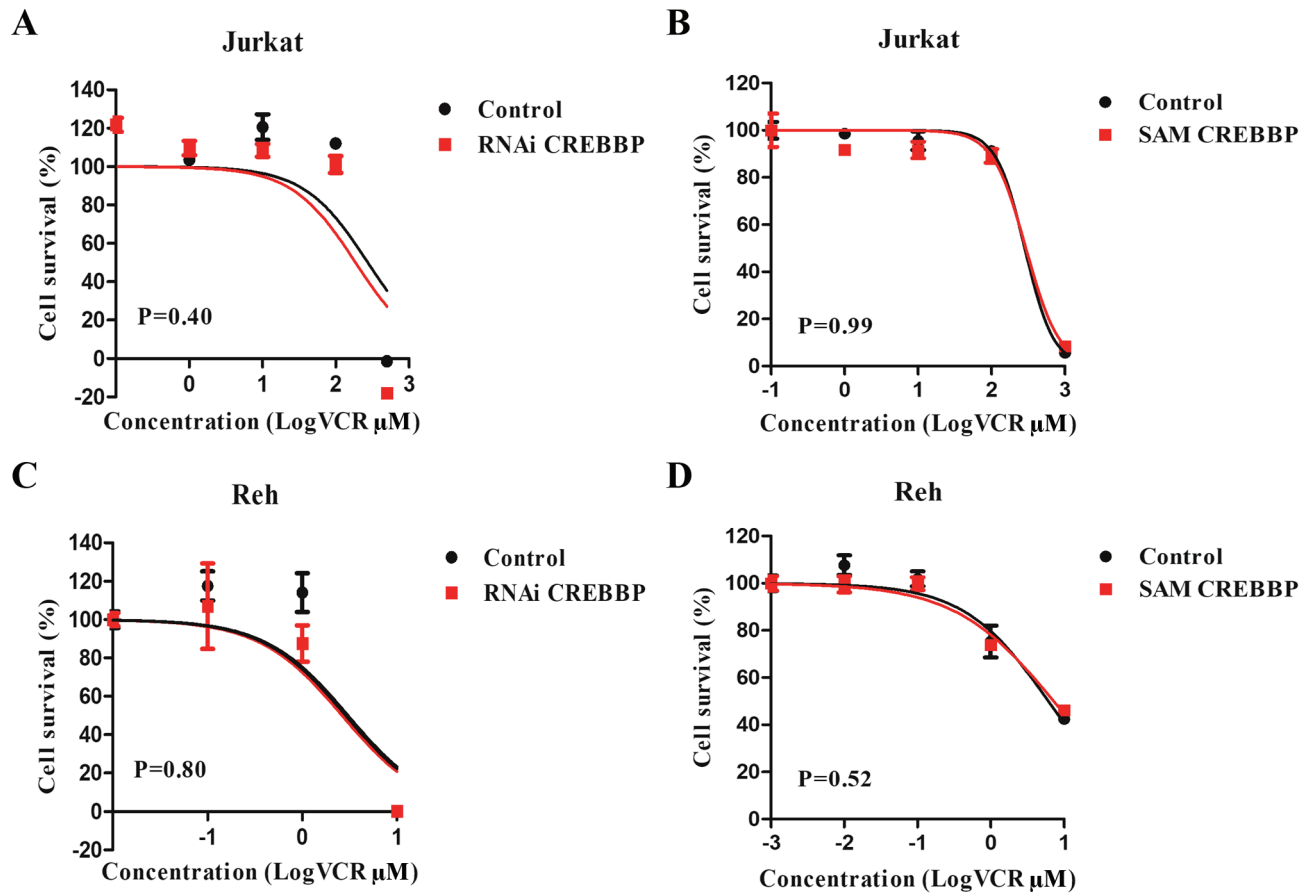

Supplement: Supplementary file 1 [file downloadSupplementary]
